# Supplementary material
Source: PubMed Central journal article supplement (PMC3014443)

Figure S1

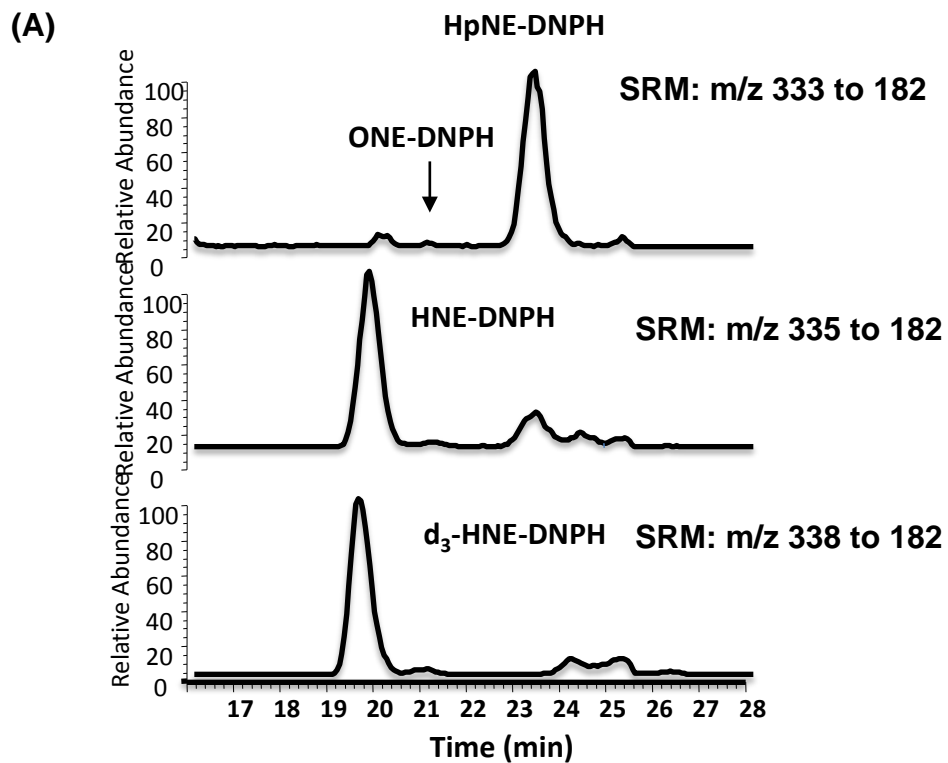

(B)

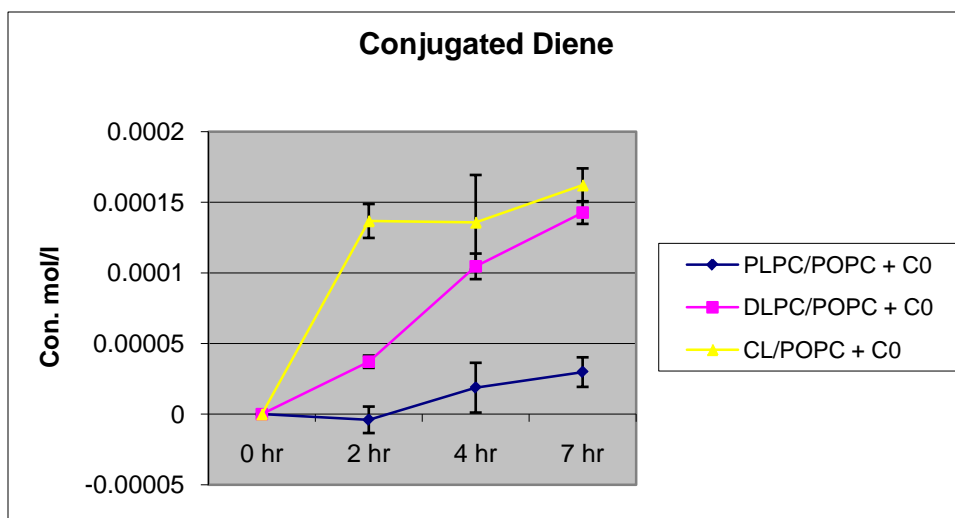

Figure S2

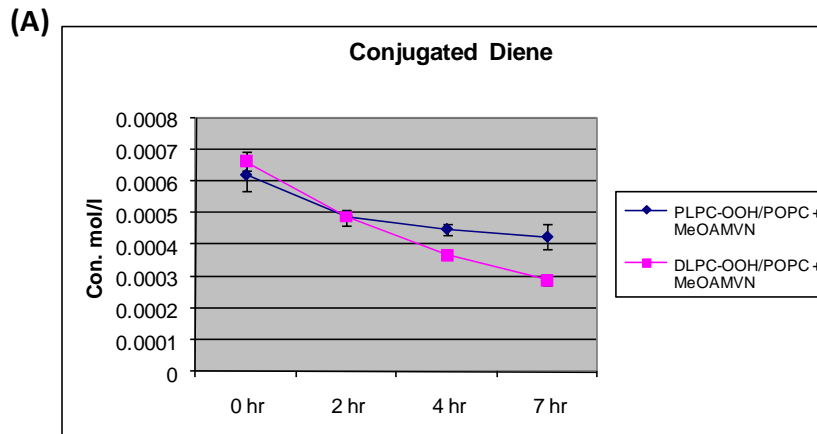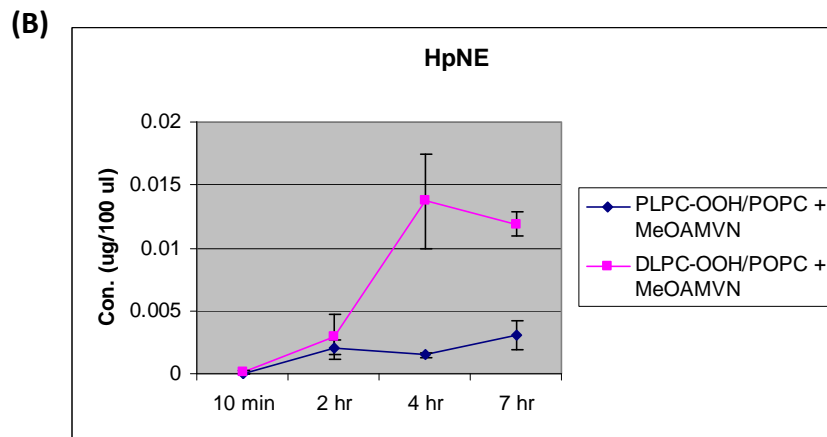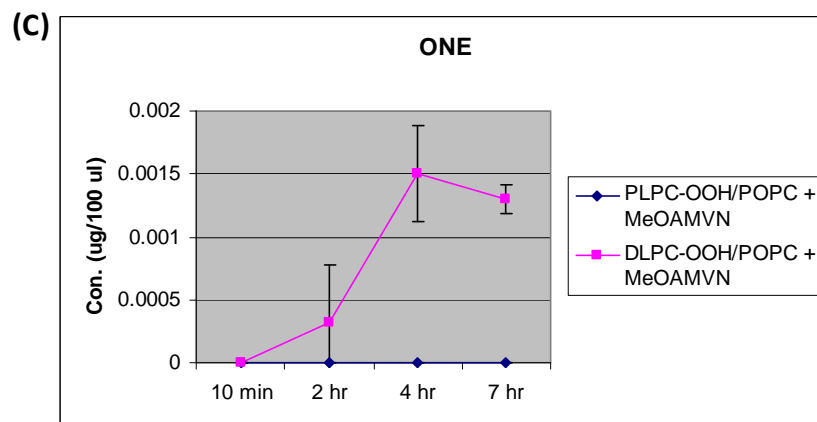

**Figure S3**

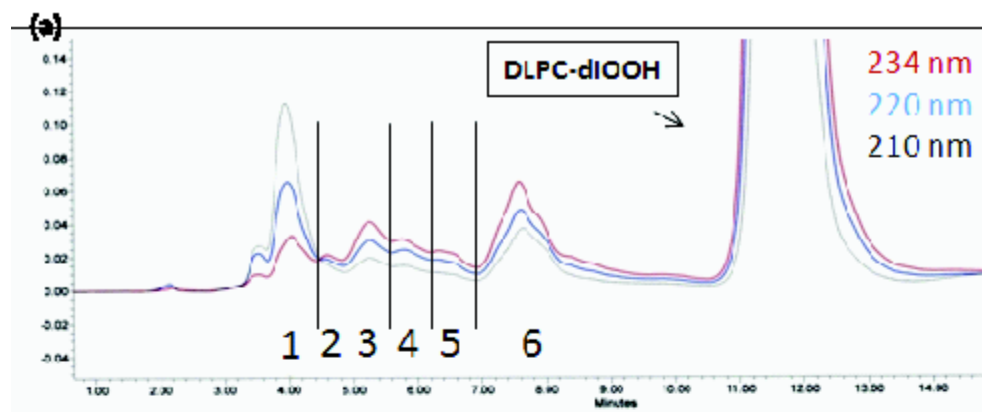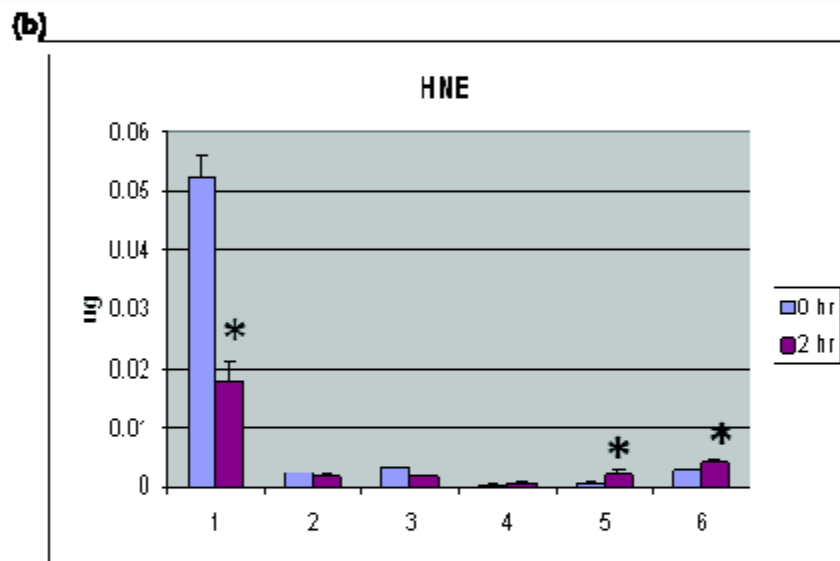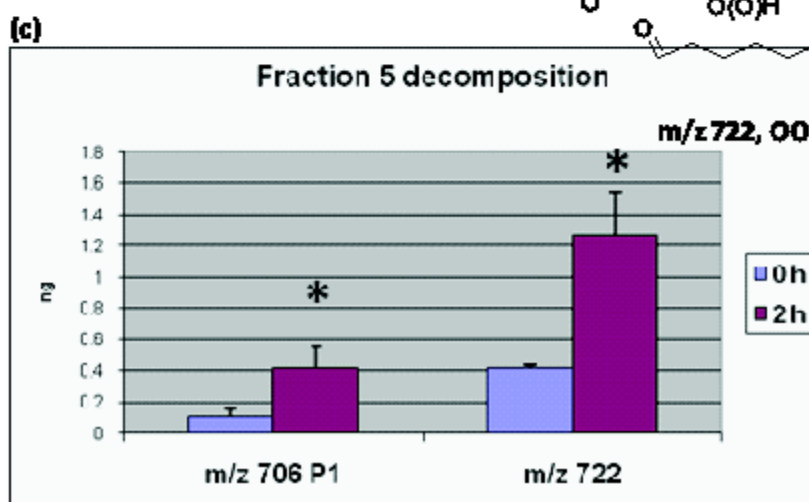

Figure S4

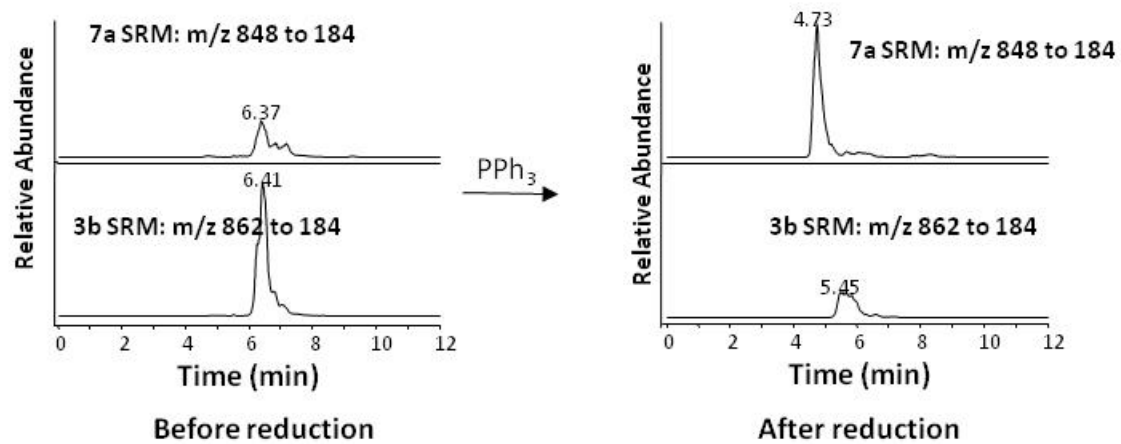

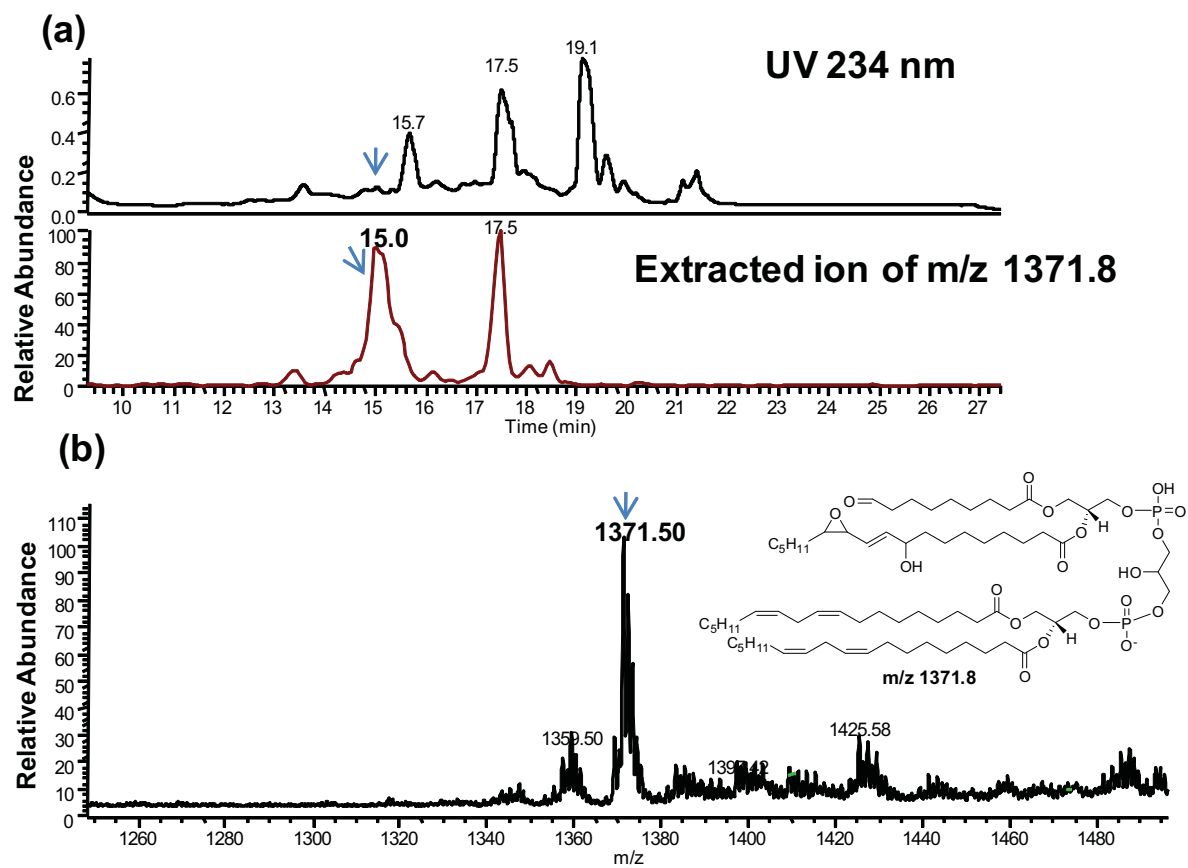

**Figure S5**

Supplement: NIHMS250458-supplement-01.pdf [file NIHMS250458-supplement-01.pdf]
